# Supplementary material for: Prosthetic-Valve Dehiscence
Source: Atypon-hosted journal article supplement (doi:10.1056/nejmicm0805989), 2010-02-17

## Supplementary Appendix

This appendix has been provided by the authors to give readers additional information about their work.

Supplement to: Lopez-Campos JL, Vieyra-Herrera G. Prosthetic-valve dehiscence. N Engl J Med 2010;362:e20.

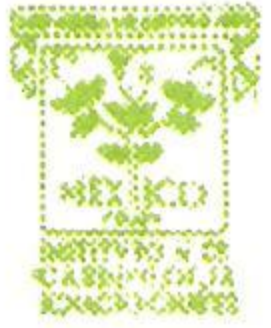

INSTITUTO NACIONAL DE CARDIOLOGIA  
IGNACIO CHAVEZ

GRAFICA DE: \_\_\_\_\_

NOMBRE: \_\_\_\_\_

REGISTRO: \_\_\_\_\_ CAMA: \_\_\_\_\_

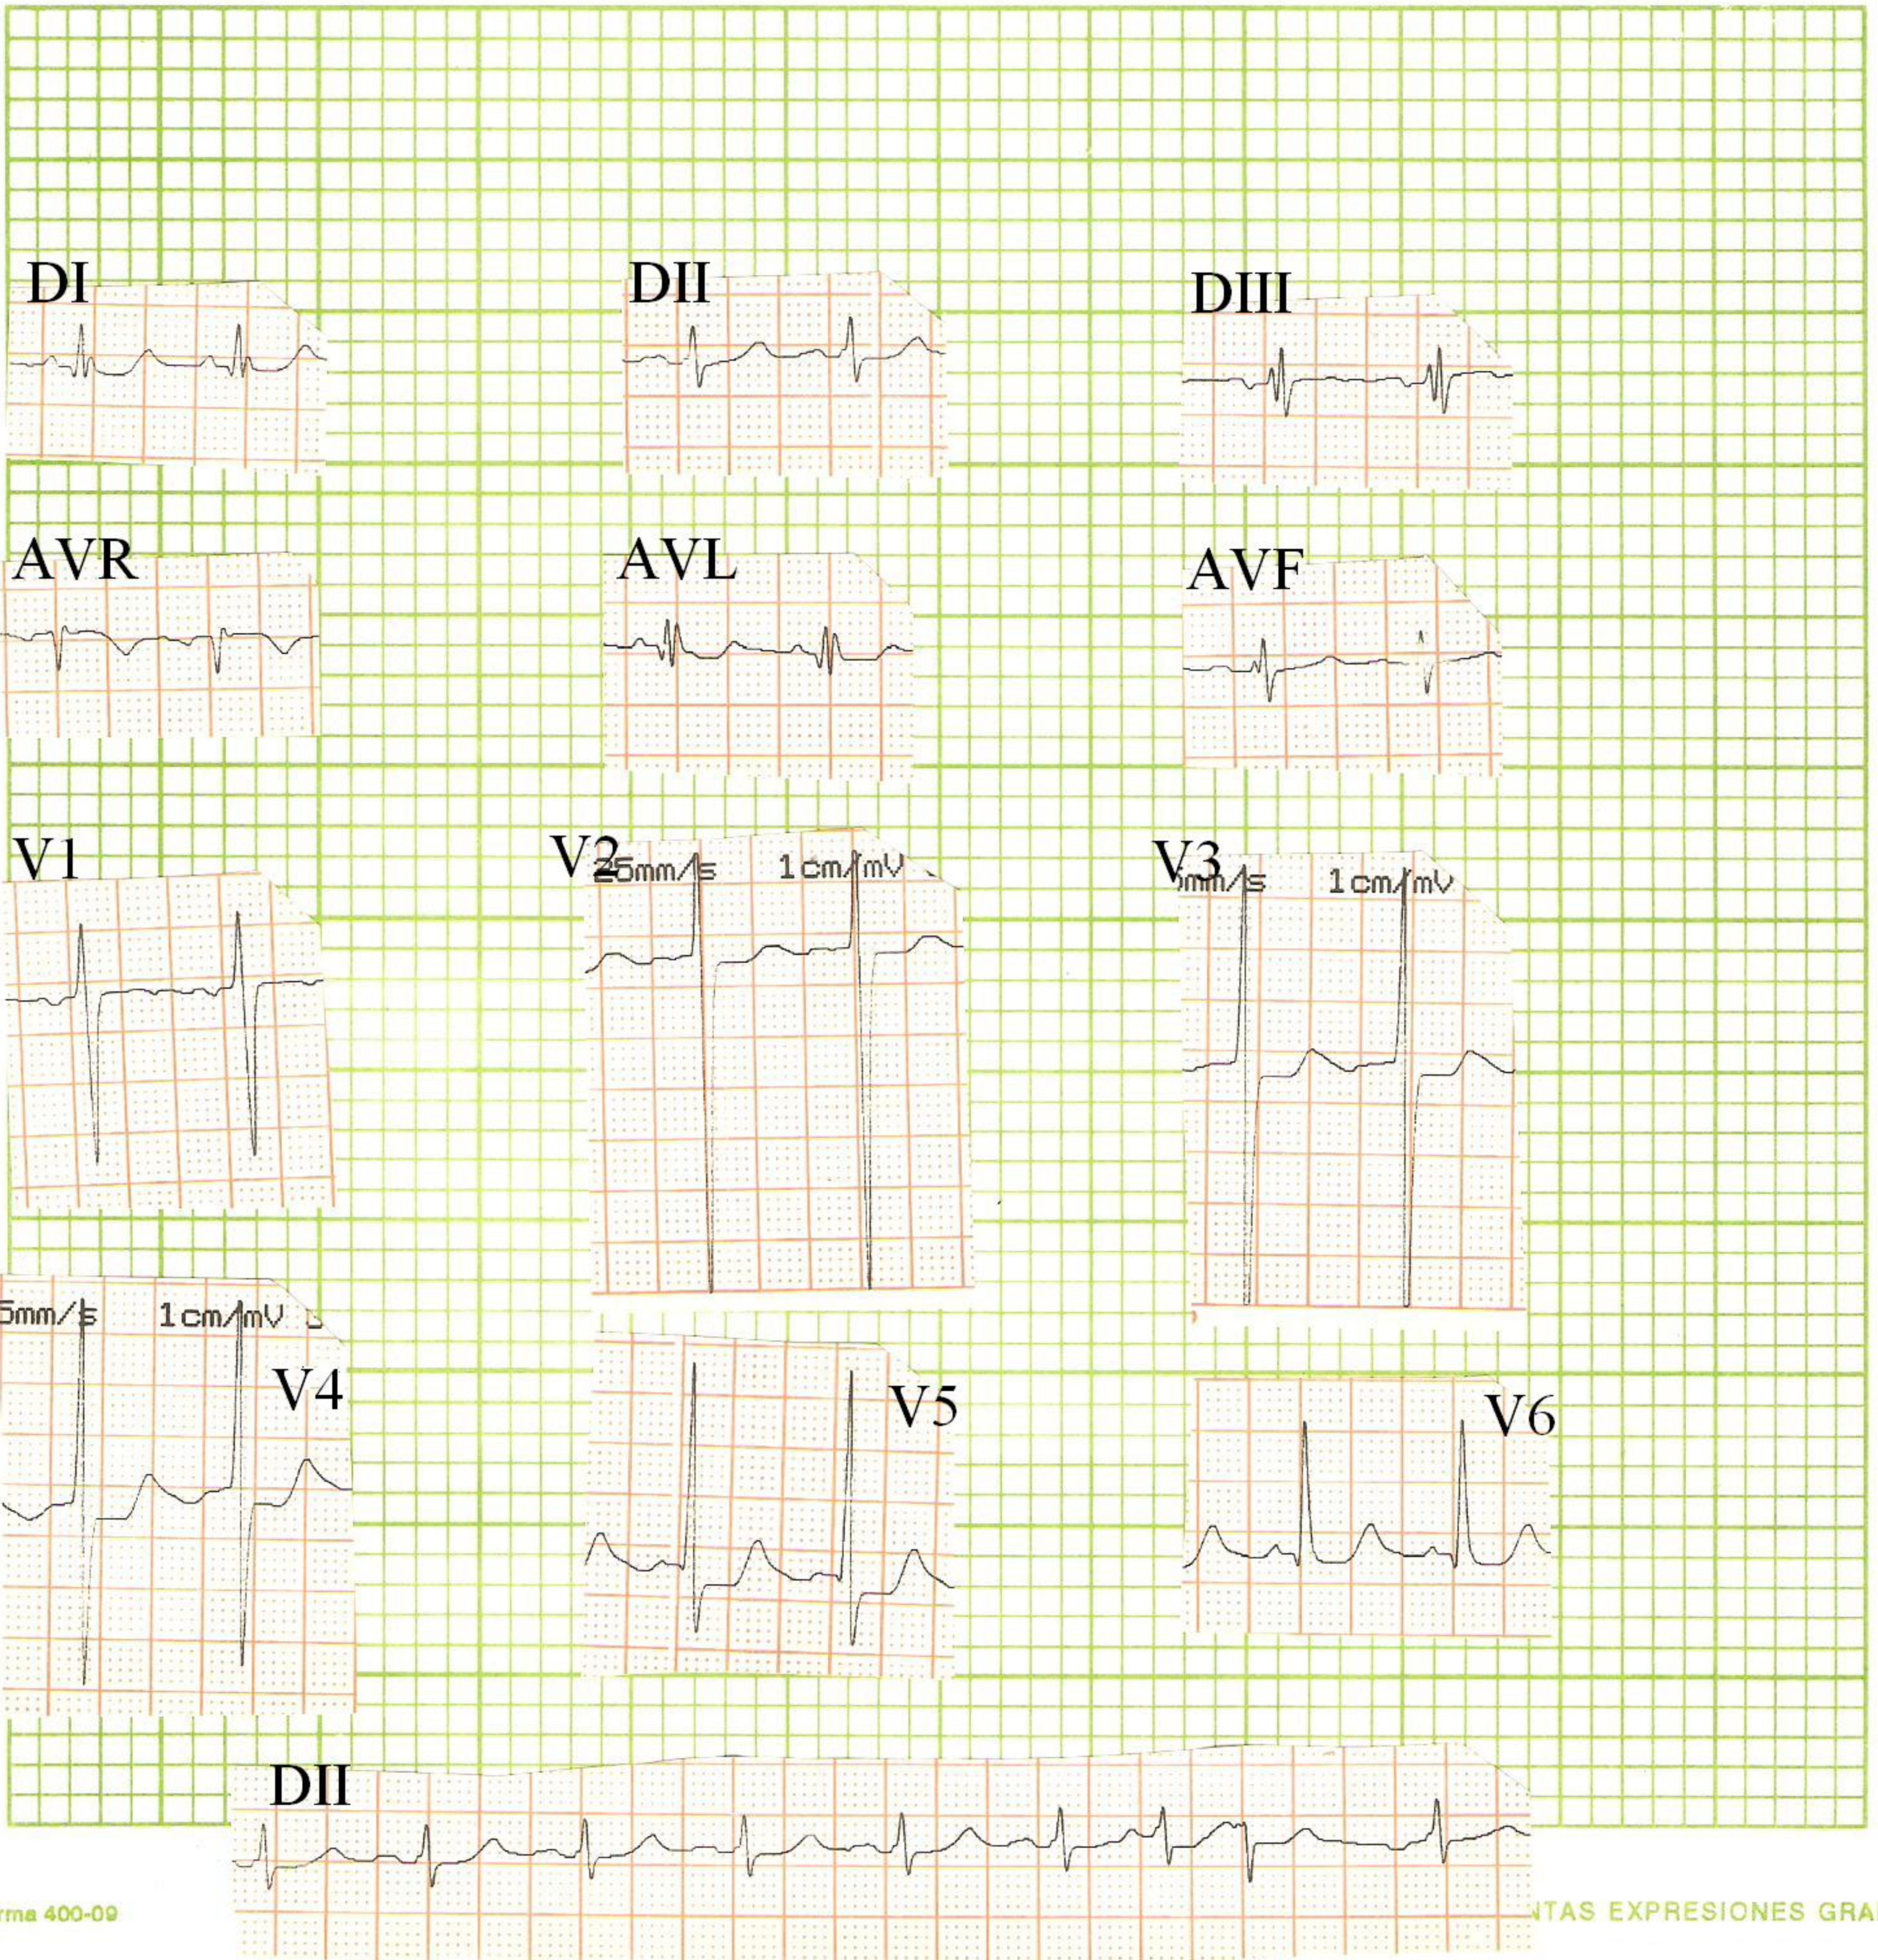

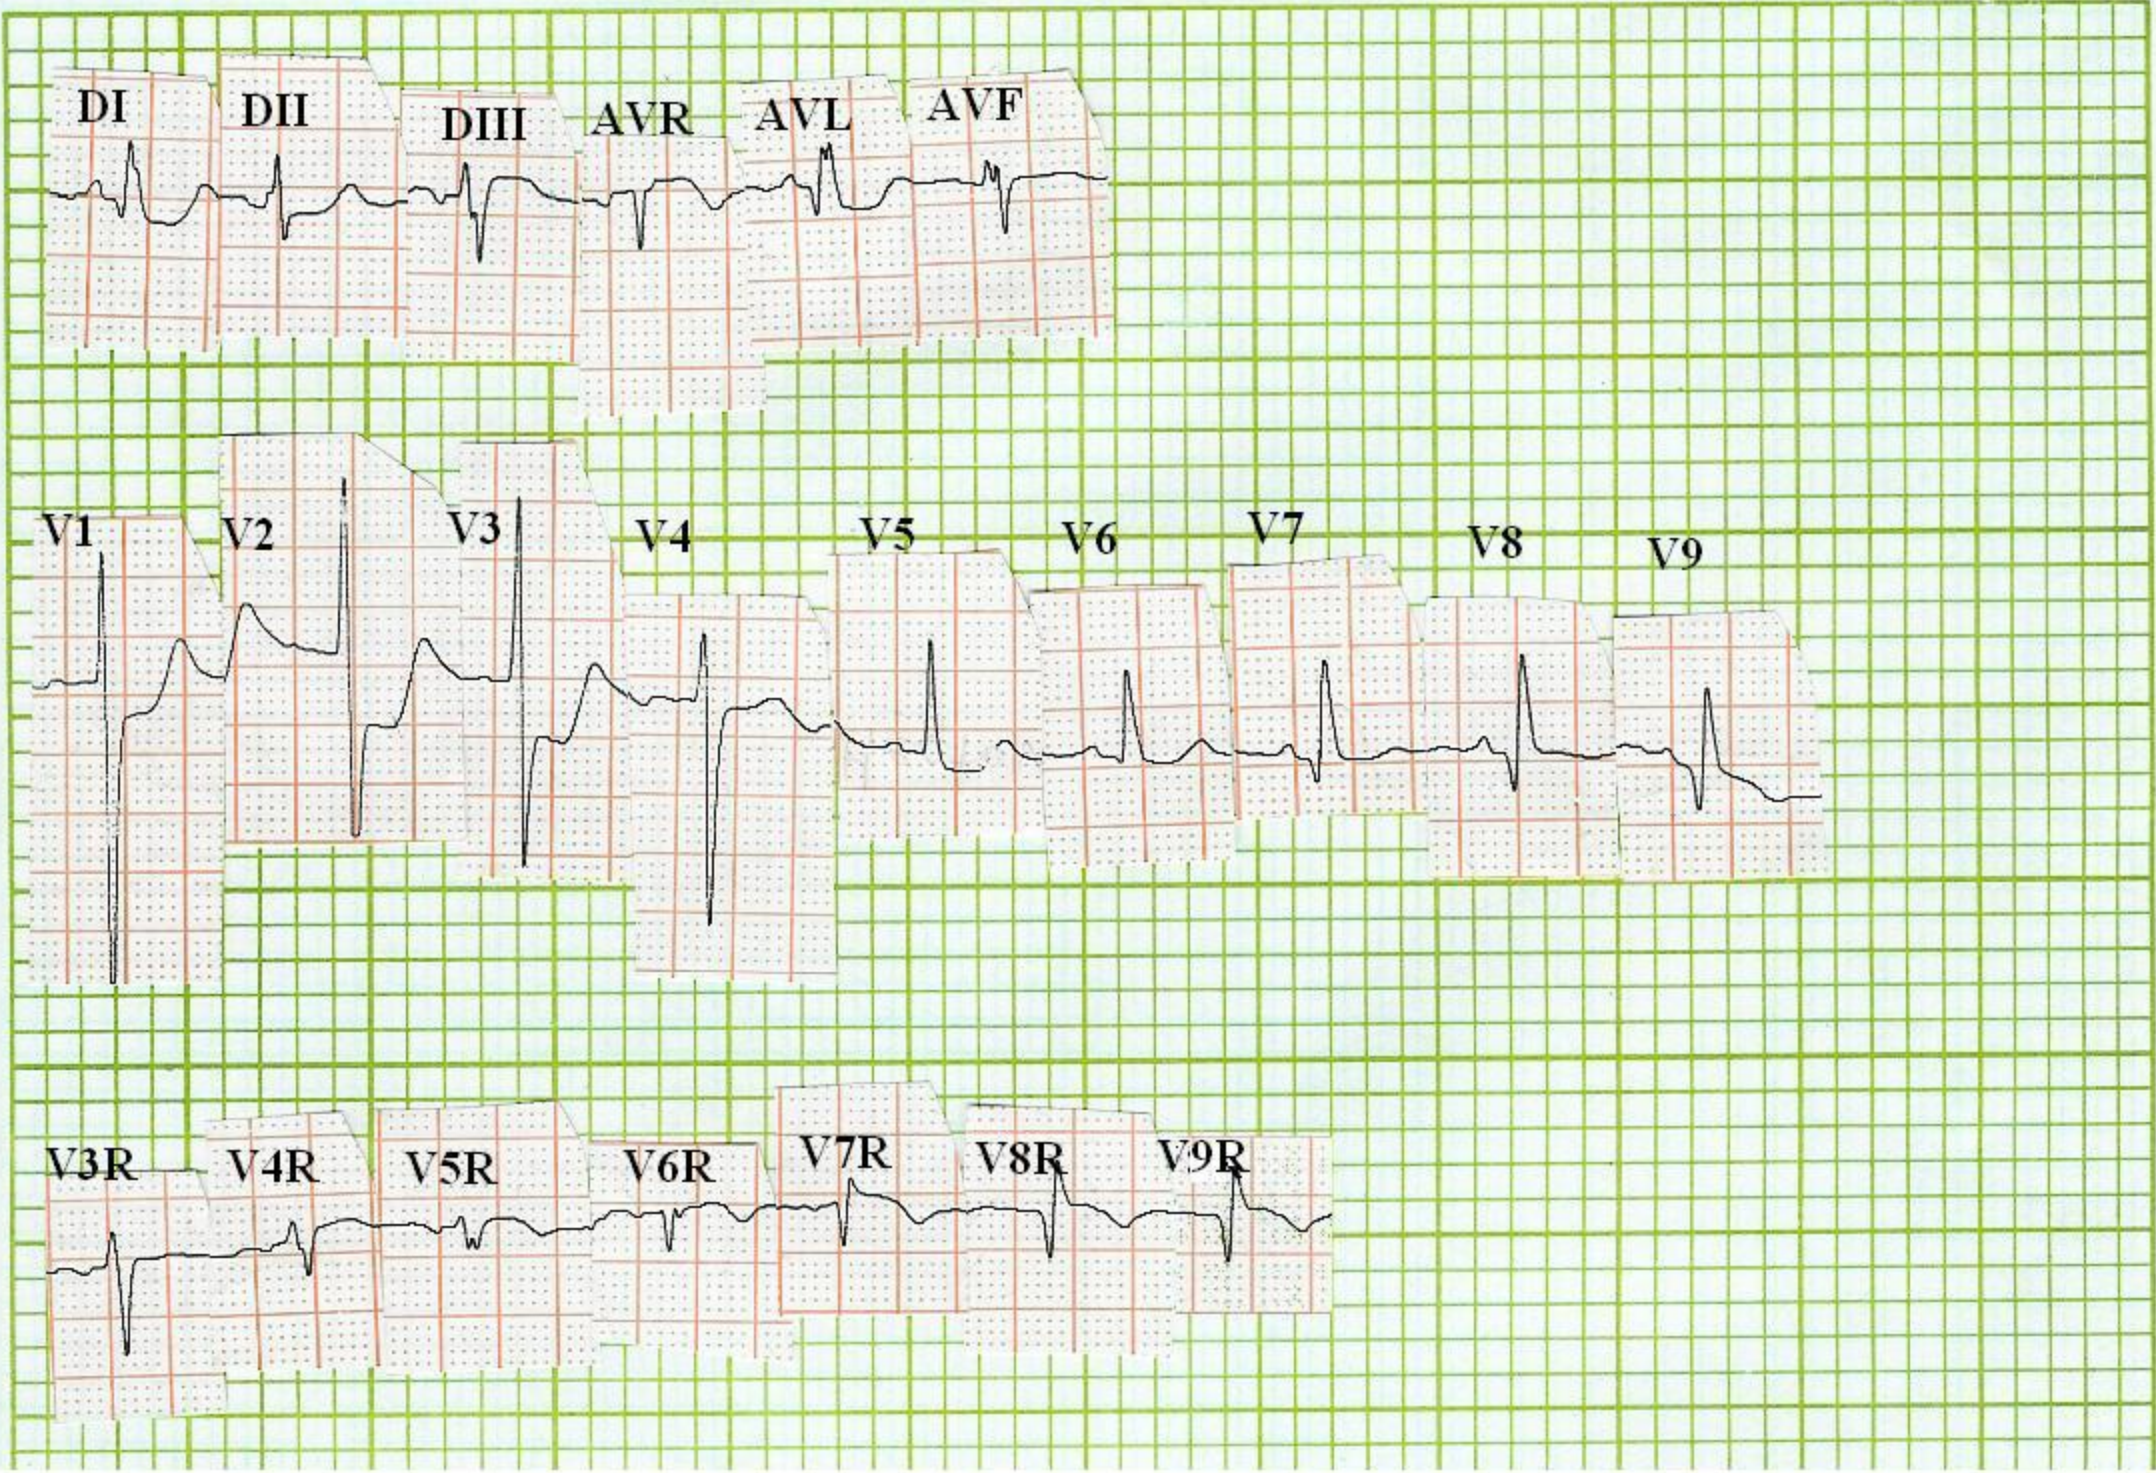

Supplement: nejm_lopez-campos_e20sa1.pdf [file nejm_lopez-campos_e20sa1.pdf]
